# Supplementary material
Source: bioRxiv or medRxiv preprint supplement (https://medrxiv.org/highwire/filestream/75060/field_highwire_adjunct_files/0/2020.03.31.20048884-1.pdf)
Supplement: Supplementary file [file 2020.03.31.20048884-1.pdf]

## Supplementary materials

### Contents

|                                                                                                                                                    |    |
|----------------------------------------------------------------------------------------------------------------------------------------------------|----|
| <i>Supplementary table 1.</i> Table methods phenotype definition .....                                                                             | 2  |
| <i>Supplementary table 2.</i> Descriptive statistics for cardiometabolic traits split by sex.....                                                  | 3  |
| <i>Supplementary table 3.</i> Bipolar disorder ICD-10 codes used in to define BPD cases .....                                                      | 4  |
| <i>Supplementary table 4.</i> UKB medication codes used to adjust biomarkers for medication intake .....                                           | 4  |
| <i>Supplementary table 5.</i> Type 2 diabetes ICD-9 and ICD-10 codes used to define cases in this study .....                                      | 5  |
| <i>Supplementary table 7.</i> Coronary artery disease ICD-9 and ICD-10 codes used in this stud...                                                  | 8  |
| <i>Supplementary table 8.</i> Operation codes used to define coronary artery disease.....                                                          | 10 |
| <i>Supplementary table 9.</i> Availability of GWAS summary statistics used to create polygenic risk scores and calculate genetic correlations..... | 12 |

Supplementary Tables 10-14 are displayed in a separate Excel document.

Supplementary table 1. Table methods phenotype definition

| Trait                                | Self-report (UKB Item: codes)                                                                                                                                    | Hospital in-patient data (main & secondary UKB Item: codes)                                                                                                                        | Death register (main & secondary UKB Item: codes)                                            | Operations OPS-4 (UKB Item: codes)       |
|--------------------------------------|------------------------------------------------------------------------------------------------------------------------------------------------------------------|------------------------------------------------------------------------------------------------------------------------------------------------------------------------------------|----------------------------------------------------------------------------------------------|------------------------------------------|
| Coronary artery disease              | <ul style="list-style-type: none"> <li>• <b>20002:</b> 1075</li> <li>• <b>20004:</b> 1070, 1095, 1523</li> <li>• <b>6150:</b> 1, 2</li> </ul>                    | <ul style="list-style-type: none"> <li>• <b>41203 &amp; 41205</b> (ICD-9): 410 - 414</li> <li>• <b>41202 &amp; 41204</b> (ICD-10): I20 - I25</li> </ul>                            | <ul style="list-style-type: none"> <li>• <b>40001 &amp; 40002:</b> I20 - I25</li> </ul>      | <b>41200:</b> K401-K469, K501, K751-K759 |
| Stroke                               | <ul style="list-style-type: none"> <li>• <b>20002:</b> 1081, 1086, 1491, 1583</li> <li>• <b>6150:</b> 3</li> </ul>                                               | <ul style="list-style-type: none"> <li>• <b>41203 &amp; 41205</b> (ICD-9): 430 – 431, 434, 436</li> <li>• <b>41202 &amp; 41204</b> (ICD-10): I60 – I61, I63 – I64</li> </ul>       | <ul style="list-style-type: none"> <li>• <b>40001 &amp; 40002:</b> I60 – I64</li> </ul>      | NA                                       |
| Type 2 diabetes (inclusion criteria) | <ul style="list-style-type: none"> <li>• <b>20002:</b> 1233, 1220</li> <li>• <b>2443,</b> 1</li> </ul>                                                           | <ul style="list-style-type: none"> <li>• <b>41203 &amp; 41205</b> (ICD-9): 25000, 25010, 25020, 25090</li> <li>• <b>41202 &amp; 41204</b> (ICD-10): E11</li> </ul>                 | <ul style="list-style-type: none"> <li>• <b>40001 &amp; 40002:</b> E11</li> </ul>            | NA                                       |
| Type 2 diabetes (exclusion criteria) | <ul style="list-style-type: none"> <li>• <b>20002:</b> 1222, 1221, 1521</li> <li>• <b>4041:</b> 1</li> <li>• <b>2986:</b> 1</li> <li>• <b>2976:</b> 1</li> </ul> | <ul style="list-style-type: none"> <li>• <b>41203 &amp; 41205</b> (ICD-9): 25011, 25021, 25091, 5881, 7751</li> <li>• <b>41202 &amp; 41204</b> (ICD-10): E10, E12 - E14</li> </ul> | <ul style="list-style-type: none"> <li>• <b>40001 &amp; 40002:</b> E10, E12 - E14</li> </ul> | NA                                       |

All items were considered at all three available time points.

Supplementary table 2. Descriptive statistics for cardiometabolic traits split by sex

| <b>Cardiometabolic traits</b>                   | <b>All female participants</b><br>( <i>N</i> = 32,985) | <b>All male participant</b><br><sup>s</sup><br>( <i>N</i> = 34,332) | <b>Female BPD cases</b><br>( <i>n</i> = 2,247) | <b>Male BPD cases</b><br>( <i>n</i> = 1,908) | <b>Female BPD controls</b><br>( <i>n</i> = 30,738) | <b>Male BPD controls</b><br>( <i>n</i> = 32,424) |
|-------------------------------------------------|--------------------------------------------------------|---------------------------------------------------------------------|------------------------------------------------|----------------------------------------------|----------------------------------------------------|--------------------------------------------------|
| <i>Continuous phenotypes: Mean (SD)</i>         |                                                        |                                                                     |                                                |                                              |                                                    |                                                  |
| Total Cholesterol, mmol/L                       | 5.92 (1.09)                                            | 5.55 (1.09)                                                         | 5.83 (1.15)                                    | 5.47 (1.17)                                  | 5.74 (1.1)                                         | 5.74 (1.1)                                       |
| LDL cholesterol, mmol/L                         | 3.73 (0.84)                                            | 3.76 (0.81)                                                         | 3.75 (0.89)                                    | 3.77 (0.91)                                  | 3.74 (0.83)                                        | 3.74 (0.82)                                      |
| HDL cholesterol, mmol/L                         | 1.66 (0.38)                                            | 1.32 (0.31)                                                         | 1.55 (0.39)                                    | 1.25 (0.32)                                  | 1.49 (0.39)                                        | 1.49 (0.38)                                      |
| Triglycerides, mmol/L                           | 1.47 (0.81)                                            | 1.99 (1.17)                                                         | 1.73 (1.01)                                    | 2.29 (1.39)                                  | 1.72 (1.03)                                        | 1.71 (1.03)                                      |
| HbA1c, mmol/mol                                 | 35.06 (4.8)                                            | 35.47 (5.95)                                                        | 35.32 (6.22)                                   | 36.46 (7.9)                                  | 35.27 (5.35)                                       | 35.19 (5.23)                                     |
| Systolic Blood Pressure, mmHg <sup>a</sup>      | 136.25 (20.33)                                         | 143.76 (19.05)                                                      | 132.82 (19.55)                                 | 141.42 (18.96)                               | 140.36 (20.04)                                     | 140.23 (20.04)                                   |
| Diastolic Blood Pressure, mmHg <sup>a</sup>     | 81.35 (10.74)                                          | 85.87 (10.95)                                                       | 81.48 (10.99)                                  | 86.09 (11.19)                                | 83.63 (11.03)                                      | 83.69 (11.11)                                    |
| Body Mass Index, kg/cm <sup>2</sup>             | 25.93 (4.56)                                           | 27.15 (3.86)                                                        | 27.78 (5.81)                                   | 28.51 (4.8)                                  | 26.48 (4.17)                                       | 26.41 (4.14)                                     |
| Waist-to-hip ratio, cm/cm                       | 0.80 (0.07)                                            | 0.92 (0.06)                                                         | 0.83 (0.07)                                    | 0.95 (0.07)                                  | 0.86 (0.09)                                        | 0.86 (0.09)                                      |
| <i>Binary phenotypes: affected cases, n (%)</i> |                                                        |                                                                     |                                                |                                              |                                                    |                                                  |
| Hypertension                                    | 783 (2.37)                                             | 2722 (7.93)                                                         | 136 (6.05)                                     | 237 (12.42)                                  | 647 (2.10)                                         | 2485 (7.66)                                      |
| Coronary artery disease                         | 483 (1.46)                                             | 1240 (3.61)                                                         | 84 (3.74)                                      | 142 (7.44)                                   | 399 (1.30)                                         | 1098 (3.39)                                      |
| Stroke                                          | 309 (0.93)                                             | 646 (1.88)                                                          | 53 (2.36)                                      | 74 (3.88)                                    | 256 (0.83)                                         | 572 (1.76)                                       |
| Type 2 diabetes                                 | 5883 (17.84)                                           | 10314 (30.04)                                                       | 396 (17.62)                                    | 562 (29.45)                                  | 5487 (17.85)                                       | 9752 (30.08)                                     |

<sup>a</sup>Diastolic and systolic blood pressure variables were adjusted for blood pressure medication (see *Methods*)

*Supplementary table 3. Bipolar disorder ICD-10 codes used in to define BPD cases*

| <b>ICD-10 code</b> | <b>UKBB code</b> | <b>Diagnosis</b>                                                                         |
|--------------------|------------------|------------------------------------------------------------------------------------------|
| <i>F31</i>         | <i>I25</i>       | <i>Bipolar affective disorder</i>                                                        |
| F31.0              | F310             | Bipolar affective disorder, current episode hypomanic                                    |
| F31.1              | F311             | Bipolar affective disorder, current episode manic without psychotic symptoms             |
| F31.2              | F312             | Bipolar affective disorder, current episode manic with psychotic symptoms                |
| F31.3              | F313             | Bipolar affective disorder, current episode mild or moderate depression                  |
| F31.4              | F314             | Bipolar affective disorder, current episode severe depression without psychotic symptoms |
| F31.5              | F315             | Bipolar affective disorder, current episode severe depression with psychotic symptoms    |
| F31.6              | F316             | Bipolar affective disorder, current episode mixed                                        |
| F31.7              | F317             | Bipolar affective disorder, currently in remission                                       |
| F31.8              | F318             | Other bipolar affective disorders                                                        |
| F31.9              | F319             | Bipolar affective disorder, unspecified                                                  |

ICD-9 diagnoses were not included as it does not define BPD as a distinct disorder. Diagnoses adapted directly from International Statistical Classification of Diseases (ICD-10; World Health Organization, 2004), as indicated on the UKB website.

*Supplementary table 4. UKB medication codes used to adjust biomarkers for medication intake*

| <b>UKB item</b> | <b>Label</b>                                            | <b>UKB code</b>                                                                  |
|-----------------|---------------------------------------------------------|----------------------------------------------------------------------------------|
| <b>6177</b>     | Do you regularly take any of the following medications? | 1: Cholesterol lowering medication<br>2: Blood pressure medication<br>3: Insulin |
| <b>20003</b>    | colestipol                                              | 1140888590                                                                       |
|                 | colestyramine                                           | 1140909780                                                                       |
|                 | colestyramine product                                   | 1141180734                                                                       |
|                 | ezetimibe                                               | 1141192736                                                                       |
|                 | ezetrol 10mg tablet                                     | 1141192740                                                                       |
|                 | supralib 160mg m/r tablet                               | 1141172214                                                                       |

|                             |            |
|-----------------------------|------------|
| atorvastatin                | 1141146234 |
| crestor 10mg tablet         | 1141192414 |
| fluvastatin                 | 1140888594 |
| lescol 20mg capsule         | 1140864592 |
| lipid lowering drug         | 1140861922 |
| lipitor 10mg tablet         | 1141146138 |
| lipostat 10mg tablet        | 1140861970 |
| pravastatin                 | 1140888648 |
| rosuvastatin                | 1141192410 |
| simvador 10mg tablet        | 1141188146 |
| simvastatin                 | 1140861958 |
| zocor 10mg tablet           | 1140881748 |
| ranzolont 10mg tablet       | 1141195196 |
| zocor heart-pro 10mg tablet | 1141200040 |
| colestid 5g/sachet granules | 1140861848 |
| bezafibrate                 | 1140861924 |
| bezalip 200mg tablet        | 1140861926 |
| questran 4g/sachet powder   | 1140861936 |
| clofibrate                  | 1140861944 |
| fenofibrate                 | 1140861954 |
| ciprofibrate                | 1140862026 |
| bezafibrate product         | 1141157260 |
| lipantil micro 67mg capsule | 1141162544 |

*Supplementary table 5.* Type 2 diabetes ICD-9 and ICD-10 codes used to define cases in this study

|                    | <b>UKB code</b> | <b>Diagnosis</b>                                                     |
|--------------------|-----------------|----------------------------------------------------------------------|
| <b>ICD-9 code</b>  |                 |                                                                      |
| 25000              | 25000           | Diabetes mellitus without mention of complication (adult-onset type) |
| 25010              | 25010           | Diabetes with ketoacidosis (adult-onset type)                        |
| 25020              | 25020           | Diabetes with coma (adult-onset type)                                |
| 25090              | 25090           | Diabetes with unspecified complications (adult-onset type)           |
| <b>ICD-10 code</b> |                 |                                                                      |

| <i>E11</i> | <i>E11</i> | <i>Non-insulin-dependent diabetes mellitus</i> |
|------------|------------|------------------------------------------------|
| E11.0      | E110       | With coma                                      |
| E11.1      | E111       | With ketoacidosis                              |
| E11.2      | E112       | With renal complications                       |
| E11.3      | E113       | With ophthalmic complications                  |
| E11.4      | E114       | With neurological complications                |
| E11.5      | E115       | With peripheral circulatory complications      |
| E11.6      | E116       | With other specified complications             |
| E11.7      | E117       | With multiple complications                    |
| E11.8      | E118       | With unspecified complications                 |
| E11.9      | E119       | Without complications                          |

*Note.* Diagnoses adopted directly from International Statistical Classification of Diseases (ICD-9, ICD-10), as indicated on the UKB website.

Supplementary table 6. Other diabetes ICD-9 and ICD-10 codes used to exclude participants from cases and controls in this study

|                    | <b>UKB code</b> | <b>Diagnosis</b>                                        |
|--------------------|-----------------|---------------------------------------------------------|
| <b>ICD-9 code</b>  |                 |                                                         |
| 25011              | 25011           | Diabetes with ketoacidosis (juvenile type)              |
| 25021              | 25021           | Diabetes with coma (juvenile type)                      |
| 25091              | 25091           | Diabetes with unspecified complications (juvenile type) |
| 5881               | 5881            | Nephrogenic diabetes insipidus                          |
| 7751               | 7751            | Neonatal diabetes mellitus                              |
| <b>ICD-10 code</b> |                 |                                                         |
| <i>E10</i>         | <i>E10</i>      | <i>Insulin-dependent diabetes mellitus</i>              |
| E10.0              | E100            | With coma                                               |
| E10.1              | E101            | With ketoacidosis                                       |
| E10.2              | E102            | With renal complications                                |
| E10.3              | E103            | With ophthalmic complications                           |
| E10.4              | E104            | With neurological complications                         |
| E10.5              | E105            | With peripheral circulatory complications               |

|            |            |                                               |
|------------|------------|-----------------------------------------------|
| E10.6      | E106       | With other specified complications            |
| E10.7      | E107       | With multiple complications                   |
| E10.8      | E108       | With unspecified complications                |
| E10.9      | E109       | Without complications                         |
| <i>E12</i> | <i>E12</i> | <i>Malnutrition-related diabetes mellitus</i> |
| E12.0      | E120       | With coma                                     |
| E12.1      | E121       | With ketoacidosis                             |
| E12.2      | E122       | With renal complications                      |
| E12.3      | E123       | With ophthalmic complications                 |
| E12.4      | E124       | With neurological complications               |
| E12.5      | E125       | With peripheral circulatory complications     |
| E12.6      | E126       | With other specified complications            |
| E12.7      | E127       | With multiple complications                   |
| E12.8      | E128       | With unspecified complications                |
| E12.9      | E129       | Without complications                         |
| <i>E13</i> | <i>E13</i> | <i>Other specified diabetes mellitus</i>      |
| E13.0      | E130       | With coma                                     |
| E13.1      | E131       | With ketoacidosis                             |
| E13.2      | E132       | With renal complications                      |
| E13.3      | E133       | With ophthalmic complications                 |
| E13.4      | E134       | With neurological complications               |
| E13.5      | E135       | With peripheral circulatory complications     |
| E13.6      | E136       | With other specified complications            |
| E13.7      | E137       | With multiple complications                   |
| E13.8      | E138       | With unspecified complications                |
| E13.9      | E139       | Without complications                         |
| <i>E14</i> | <i>E14</i> | <i>Unspecified diabetes mellitus</i>          |
| E14.0      | E140       | With coma                                     |
| E14.1      | E141       | With ketoacidosis                             |
| E14.2      | E142       | With renal complications                      |

|       |      |                                           |
|-------|------|-------------------------------------------|
| E14.3 | E143 | With ophthalmic complications             |
| E14.4 | E144 | With neurological complications           |
| E14.5 | E145 | With peripheral circulatory complications |
| E14.6 | E146 | With other specified complications        |
| E14.7 | E147 | With multiple complications               |
| E14.8 | E148 | With unspecified complications            |
| E14.9 | E149 | Without complications                     |

Diagnoses adopted directly from International Statistical Classification of Diseases (ICD-9, ICD-10), as indicated on the UKB website.

*Supplementary table 7. Coronary artery disease ICD-9 and ICD-10 codes used in this stud*

| <b>UKBB code</b>   |            | <b>Diagnosis</b>                                          |
|--------------------|------------|-----------------------------------------------------------|
| <b>ICD-9 code</b>  |            |                                                           |
| 4109               | 4019       | Acute myocardial infarction                               |
| 4119               | 4119       | Other acute and subacute forms of ischaemic heart disease |
| 4129               | 4129       | Old myocardial infarction                                 |
| 4139               | 4139       | Angina pectoris                                           |
| 4140               | 4140       | Coronary atherosclerosis                                  |
| 4141               | 4141       | Aneurysm of heart                                         |
| 4148               | 4148       | Other specified forms of chronic ischaemic heart disease  |
| 4149               | 4149       | Chronic ischaemic heart disease, unspecified              |
| <b>ICD-10 code</b> |            |                                                           |
| <i>I20</i>         | <i>I20</i> | <i>Angina pectoris</i>                                    |
| I20.0              | I200       | Unstable angina                                           |
| I20.1              | I201       | Angina pectoris with documented spasm                     |
| I20.8              | I208       | Other forms of angina pectoris                            |
| I20.9              | I209       | Angina pectoris, unspecified                              |
| <i>I21</i>         | <i>I21</i> | <i>Acute myocardial infarction</i>                        |
| I21.0              | I210       | Acute transmural myocardial infarction of anterior wall   |
| I21.1              | I211       | Acute transmural myocardial infarction of inferior wall   |



|            |            |                                                                                                                        |
|------------|------------|------------------------------------------------------------------------------------------------------------------------|
| I21.2      | I212       | Acute transmural myocardial infarction of other sites                                                                  |
| I21.3      | I213       | Acute transmural myocardial infarction of unspecified site                                                             |
| I21.4      | I214       | Acute subendocardial myocardial infarction                                                                             |
| I21.9      | I219       | Acute myocardial infarction, unspecified                                                                               |
| <i>I22</i> | <i>I22</i> | <i>Subsequent myocardial infarction</i>                                                                                |
| I22.0      | I220       | Subsequent myocardial infarction of anterior wall                                                                      |
| I22.1      | I221       | Subsequent myocardial infarction of inferior wall                                                                      |
| I22.8      | I228       | Subsequent myocardial infarction of other sites                                                                        |
| I22.9      | I229       | Subsequent myocardial infarction of unspecified site                                                                   |
| <i>I23</i> | <i>I23</i> | <i>Certain current complications following acute myocardial infarction</i>                                             |
| I23.0      | I230       | Haemopericardium as current complication following acute myocardial infarction                                         |
| I23.1      | I231       | Atrial septal defect as current complication following acute myocardial infarction                                     |
| I23.2      | I232       | Ventricular septal defect as current complication following acute myocardial infarction                                |
| I23.3      | I233       | Rupture of cardiac wall without haemopericardium as current complication following acute myocardial infarction         |
| I23.4      | I234       | Rupture of chordae tendineae as current complication following acute myocardial infarction                             |
| I23.5      | I235       | Rupture of papillary muscle as current complication following acute myocardial infarction                              |
| I23.6      | I236       | Thrombosis of atrium, auricular appendage and ventricle as current complications following acute myocardial infarction |
| I23.8      | I238       | Other current complications following acute myocardial infarction                                                      |
| <i>I24</i> | <i>I24</i> | <i>Other acute ischaemic heart diseases</i>                                                                            |
| I24.0      | I240       | Coronary thrombosis not resulting in myocardial infarction                                                             |
| I24.1      | I241       | Dressler's syndrome                                                                                                    |
| I24.8      | I248       | Other forms of acute ischaemic heart disease                                                                           |
| I24.9      | I249       | Acute ischaemic heart disease, unspecified                                                                             |
| <i>I25</i> | <i>I25</i> | <i>Chronic ischaemic heart disease</i>                                                                                 |
| I25.0      | I250       | Atherosclerotic cardiovascular disease, so described                                                                   |

|       |      |                                                |
|-------|------|------------------------------------------------|
| I25.1 | I251 | Atherosclerotic heart disease                  |
| I25.2 | I252 | Old myocardial infarction                      |
| I25.3 | I253 | Aneurysm of heart                              |
| I25.4 | I254 | Coronary artery aneurysm                       |
| I25.5 | I255 | Ischaemic cardiomyopathy                       |
| I25.6 | I256 | Silent myocardial ischaemia                    |
| I25.8 | I258 | Other forms of chronic ischaemic heart disease |
| I25.9 | I259 | Chronic ischaemic heart disease, unspecified   |

---

*Note.* Diagnoses adopted directly from International Statistical Classification of Diseases (ICD-9, ICD-10), as indicated on the UKB website.

*Supplementary table 8.* Operation codes used to define coronary artery disease

---

| <b>OPCS-4 code</b> | <b>UKB code</b> | <b>Diagnosis</b>                                                    |
|--------------------|-----------------|---------------------------------------------------------------------|
| <i>K40</i>         | <i>K40</i>      | <i>Saphenous vein graft replacement of coronary artery</i>          |
| K40.1              | K401            | Saphenous vein graft replacement of one coronary artery             |
| K40.2              | K402            | Saphenous vein graft replacement of two coronary arteries           |
| K40.3              | K403            | Saphenous vein graft replacement of three coronary arteries         |
| K40.4              | K404            | Saphenous vein graft replacement of four or more coronary arteries  |
| K40.8              | K408            | Other specified saphenous vein graft replacement of coronary artery |
| K40.9              | K409            | Unspecified saphenous vein graft replacement of coronary artery     |
| <i>K41</i>         | <i>K41</i>      | <i>Other autograft replacement of coronary artery</i>               |
| K41.1              | K411            | Autograft replacement of one coronary artery NEC                    |
| K41.2              | K412            | Autograft replacement of two coronary arteries NEC                  |
| K41.3              | K413            | Autograft replacement of three coronary arteries NEC                |
| K41.4              | K414            | Autograft replacement of four or more coronary arteries NEC         |
| K41.8              | K418            | Other specified other autograft replacement of coronary artery      |
| K41.9              | K419            | Unspecified other autograft replacement of coronary artery          |

|            |            |                                                                           |
|------------|------------|---------------------------------------------------------------------------|
| <i>K42</i> | <i>K42</i> | <i>Allograft replacement of coronary artery</i>                           |
| K42.1      | K421       | Allograft replacement of one coronary artery                              |
| K42.2      | K422       | Allograft replacement of two coronary arteries                            |
| K42.3      | K423       | Allograft replacement of three coronary arteries                          |
| K42.4      | K424       | Allograft replacement of four or more coronary arteries                   |
| K42.8      | K428       | Other specified allograft replacement of coronary artery                  |
| K42.9      | K429       | Unspecified allograft replacement of coronary artery                      |
| <i>K43</i> | <i>K43</i> | <i>Prosthetic replacement of coronary artery</i>                          |
| K43.1      | K431       | Prosthetic replacement of one coronary artery                             |
| K43.2      | K432       | Prosthetic replacement of two coronary arteries                           |
| K43.3      | K433       | Prosthetic replacement of three coronary arteries                         |
| K43.4      | K434       | Prosthetic replacement of four or more coronary arteries                  |
| K43.8      | K438       | Other specified prosthetic replacement of coronary artery                 |
| K43.9      | K439       | Unspecified prosthetic replacement of coronary artery                     |
| K44        | K44        | Other replacement of coronary artery                                      |
| K44.1      | K441       | Replacement of coronary arteries using multiple methods                   |
| K44.2      | K442       | Revision of replacement of coronary artery                                |
| K44.8      | K448       | Other specified other replacement of coronary artery                      |
| K44.9      | K449       | Unspecified other replacement of coronary artery                          |
| <i>K45</i> | <i>K45</i> | <i>Connection of thoracic artery to coronary artery</i>                   |
| K45.1      | K451       | Double anastomosis of mammary arteries to coronary arteries               |
| K45.2      | K452       | Double anastomosis of thoracic arteries to coronary arteries NEC          |
| K45.3      | K453       | Anastomosis of mammary artery to left anterior descending coronary artery |
| K45.4      | K454       | Anastomosis of mammary artery to coronary artery NEC                      |
| K45.5      | K455       | Anastomosis of thoracic artery to coronary artery NEC                     |
| K45.6      | K456       | Revision of connection of thoracic artery to coronary artery              |
| K45.8      | K458       | Other specified connection of thoracic artery to coronary artery          |
| K45.9      | K459       | Unspecified connection of thoracic artery to coronary artery              |
| <i>K46</i> | <i>K46</i> | <i>Other bypass of coronary artery</i>                                    |
| K46.1      | K461       | Double implantation of mammary arteries into heart                        |

|            |            |                                                                                                                   |
|------------|------------|-------------------------------------------------------------------------------------------------------------------|
| K46.2      | K462       | Double implantation of thoracic arteries into heart NEC                                                           |
| K46.3      | K463       | Implantation of mammary artery into heart NEC                                                                     |
| K46.4      | K464       | Implantation of thoracic artery into heart NEC                                                                    |
| K46.5      | K465       | Revision of implantation of thoracic artery into heart                                                            |
| K46.8      | K468       | Other specified other bypass of coronary artery                                                                   |
| K46.9      | K469       | Unspecified other bypass of coronary artery                                                                       |
| <i>K50</i> | <i>K50</i> | <i>Other therapeutic transluminal operations on coronary artery</i>                                               |
| K50.1      | K501       | Percutaneous transluminal laser coronary angioplasty                                                              |
| K75        | K75        | Percutaneous transluminal balloon angioplasty and insertion of stent into coronary artery                         |
| K75.1      | K751       | Percutaneous transluminal balloon angioplasty and insertion of 1-2 drug-eluting stents into coronary artery       |
| K75.2      | K752       | Percutaneous transluminal balloon angioplasty and insertion of 3 or more drug-eluting stents into coronary artery |
| K75.3      | K753       | Percutaneous transluminal balloon angioplasty and insertion of 1-2 stents into coronary artery                    |
| K75.4      | K754       | Percutaneous transluminal balloon angioplasty and insertion of 3 or more stents into coronary artery NEC          |
| K75.8      | K758       | Other specified percutaneous transluminal balloon angioplasty and insertion of stent into coronary artery         |
| K75.9      | K759       | Unspecified percutaneous transluminal balloon angioplasty and insertion of stent into coronary artery             |

---

Surgery procedures adopted according to the Office of Population Censuses and Surveys Classification of Interventions and Procedures, version 4 (OPCS-4), directly from the UKB website.

*Supplementary table 9.* Availability of GWAS summary statistics used to create polygenic risk scores and calculate genetic correlations.

| <b>Trait</b>                                         | <b>Consortium</b> | <b>Availability of the summary statistics/<br/>download link</b>                                                    |
|------------------------------------------------------|-------------------|---------------------------------------------------------------------------------------------------------------------|
| Bipolar disorder<br>(Stahl et al., 2019)             | PGC               | <a href="https://www.med.unc.edu/pgc/results-and-downloads/">https://www.med.unc.edu/pgc/results-and-downloads/</a> |
| Systolic blood pressure<br>(Evangelou et al., 2018)  | ICBP <sup>a</sup> | Requested from authors                                                                                              |
| Diastolic blood pressure<br>(Evangelou et al., 2018) | ICBP <sup>a</sup> | Requested from authors                                                                                              |

|                                                               |                    |                                                                                                                                                                                                                                     |
|---------------------------------------------------------------|--------------------|-------------------------------------------------------------------------------------------------------------------------------------------------------------------------------------------------------------------------------------|
| Body mass index<br>(Locke et al., 2015)                       | GIANT              | <a href="https://portals.broadinstitute.org/collaboration/giant/index.php/GIANT_consortium_data_files">https://portals.broadinstitute.org/collaboration/giant/index.php/GIANT_consortium_data_files</a>                             |
| Body mass index<br>(Yengo et al., 2018)                       | GIANT <sup>b</sup> | <a href="https://portals.broadinstitute.org/collaboration/giant/index.php/GIANT_consortium_data_files">https://portals.broadinstitute.org/collaboration/giant/index.php/GIANT_consortium_data_files</a>                             |
| Waist-to-hip ratio (Shungin et al., 2015)                     | GIANT              | <a href="http://portals.broadinstitute.org/collaboration/giant/images/5/54/GIANT_2015_WHR_COMBINED_EUR.txt.gz">http://portals.broadinstitute.org/collaboration/giant/images/5/54/GIANT_2015_WHR_COMBINED_EUR.txt.gz</a>             |
| Waist-to-hip ratio adjusted for BMI<br>(Shungin et al., 2015) | GIANT              | <a href="http://portals.broadinstitute.org/collaboration/giant/images/e/eb/GIANT_2015_WHRadjBMI_COMBINED_EUR.txt.gz">http://portals.broadinstitute.org/collaboration/giant/images/e/eb/GIANT_2015_WHRadjBMI_COMBINED_EUR.txt.gz</a> |
| HbA1c<br>(Wheeler et al., 2017)                               | MAGIC              | <a href="ftp://ftp.sanger.ac.uk/pub/magic/HbA1c_METAL_European.txt.gz">ftp://ftp.sanger.ac.uk/pub/magic/HbA1c_METAL_European.txt.gz</a>                                                                                             |
| Total Cholesterol<br>(Willer et al., 2013)                    | GLGC               | <a href="http://csg.sph.umich.edu/willer/public/lipids2013/">http://csg.sph.umich.edu/willer/public/lipids2013/</a>                                                                                                                 |
| Triglycerides<br>(Willer et al., 2013)                        | GLGC               | <a href="http://csg.sph.umich.edu/willer/public/lipids2013/">http://csg.sph.umich.edu/willer/public/lipids2013/</a>                                                                                                                 |
| High-density lipoprotein cholesterol<br>(Willer et al., 2013) | GLGC               | <a href="http://csg.sph.umich.edu/willer/public/lipids2013/">http://csg.sph.umich.edu/willer/public/lipids2013/</a>                                                                                                                 |
| Coronary artery disease<br>(Nikpay et al., 2015)              | CARDIoGRAM         | <a href="http://www.cardiogramplusc4d.org/data-downloads/">http://www.cardiogramplusc4d.org/data-downloads/</a>                                                                                                                     |
| Stroke<br>(Malik et al., 2018)                                | MEGASTROKE         | <a href="http://www.megastroke.org">http://www.megastroke.org</a>                                                                                                                                                                   |
| Diabetes type 2<br>(Scott, R. A. et al., 2017)                | DIAGRAM            | <a href="http://diagram-consortium.org/downloads.html">http://diagram-consortium.org/downloads.html</a>                                                                                                                             |

---

<sup>a</sup> The blood pressure GWAS summary statistics contained the UKB study. This version was used for genetic correlations in this study. ICBP only summary statistics (excluding UKB) were used to create PRS to avoid overfitting. <sup>b</sup> The BMI (Yengo et al., 2018) GWAS summary statistics, which we used to calculate genetic correlations, were discovered in the UKB which is why we used summary statistics from (Locke et al., 2015) for PRS calculation.
